# Supplementary material for: High-speed laser-scanning biological microscopy using FACED
Source: Springer Nature journal article supplement (doi:10.1038/s41596-021-00576-4), 2021-08-02
Supplement: MOESM3 [file 41596_2021_576_MOESM3_ESM26.zip]

## Sheet: Sheet1
2.41246e+06
1.35233e+07
1.2548e+07
1.62425e+07
1.02825e+07
2.86801e+07
2.7997e+07
1.29946e+07
1.05771e+07
2.0957e+07
7.30899e+06
3.0341e+07
8.98111e+06
1.14761e+07
1.21356e+07
2.06672e+07
1.11071e+07
6.40616e+06
6.76855e+06
1.0546e+07
9.17528e+06
1.9109e+07
1.12898e+07
1.28284e+07
3.22398e+07
1.48133e+07
